# Supplementary material
Source: Research Square preprint supplement (doi:10.21203/rs.3.rs-9752587/v1)
Supplement: Supplementary file 1 [file 5b48bb87e87fd270d8d75964.docx]

**Supporting Information**

Metabolome analysis of sea buckthorn fruits from different years. (A) PCA Analysis of Fruits from 5-year-old and 6-year-old Sea buckthorn Plants. (B) PCA Analysis of Sea buckthorn Fruits from 4-year-old and 5-year-old Grades. (C) OPLSDA analysis of fruits from 5-year-old and 6-year-old sea buckthorn plants. (D) Replacement test between 5-year-old fruits and 6-year-old fruits. (E) OPLSDA analysis of fruits from 4-year and 5-year-old plants. (F) Replacement test between 4-year-old fruits and 5-year-old fruits. (G) Scatter plot showing differences between fruits of 5-year-old and 6-year-old plants. (H) Scatter plot showing differences between fruits of 4-year-old and 5-year-old plants. (I) Annotation of secondary metabolites among the differential metabolites between 5-year-old and 6-year-old fruits. (J) Annotation of secondary metabolites among differential metabolites between 4-year-old and 5-year-old fruits. (K) KEGG pathway annotations of differential metabolites between 5-year-old and 6-year-old fruits. (L) KEGG pathway annotations of differential metabolites between 4-year-old and 5-year-old fruits(**Figure S1);** Metabolome analysis of sea buckthorn branch from different years. (A) PCA Analysis of branches from 5-year-old and 6-year-old Sea buckthorn Plants. (B) PCA Analysis of Sea buckthorn branches from 4-year-old and 5-year-old Grades. (C) OPLSDA analysis of branches from 5-year-old and 6-year-old sea buckthorn plants. (D) Replacement test between 5-year-old branches and 6-year-old branches. (E) OPLSDA analysis of branches from 4-year and 5-year-old plants. (F) Replacement test between 4-year-old branches and 5-year-old branches. (G) Scatter plot showing differences between branches of 5-year-old and 6-year-old plants. (H) Scatter plot showing differences between branches of 4-year-old and 5-year-old plants. (I) Annotation of secondary metabolites among the differential metabolites between 5-year-old and 6-year-old branches. (J) Annotation of secondary metabolites among differential metabolites between 4-year-old and 5-year-old branches. (K) KEGG pathway annotations of differential metabolites between 5-year-old and 6-year-old branches. (L) KEGG pathway annotations of differential metabolites between 4-year-old and 5-year-old branches**(Figure S2);** Transcriptome analysis of sea buckthorn branches in different year. (A) Venn diagram analysis of differentially expressed genes between 5-year-old and 6-year-old branches. (B) Venn diagram analysis of differentially expressed genes between 4-year-old and 5-year-old branches. (C) PCA analysis of differentially expressed genes between 5-year-old and 6-year-old branches. (D) PCA analysis of differentially expressed genes between 4-year-old and 5-year-old branches. (E) Heatmap analysis of differentially expressed genes between 5-year-old and 6-year-old branches. (F) Heatmap analysis of differentially expressed genes between 4-year-old and 5-year-old branches. (G) KEGG pathway analysis of differentially expressed genes between 5-year-old and 6-year-old branches. (H) KEGG pathway analysis of differentially expressed genes between 4-year-old and 5-year-old branches**Figure S3;** WGCNA analysis of sea buckthorn branches in different years. (A) WGCNA clustering analysis of genes from 4-year-old and 5-year-old branches. (B) WGCNA clustering analysis of genes from 5-year-old and 6-year-old branches. (C) WGCNA module analysis of genes from 4-year-old and 5-year-old branches. (D) WGCNA module analysis of genes from 5-year-old and 6-year-old branches.**Figure S4;** Correlation analysis between the top 10 genes in each module of branches and metabolites of fruit growth**Figure S5;** Comparison of physical properties and color indices of *Hippophae rhamnoides* fruits at different tree ages (n=5)**Table S1;** KEGG pathway enrichment analysis of differentially metabolites in *Hippophae rhamnoides* fruits at different tree ages**Table S2;** Standard product information**Table S3;** Gradient concentration information of anthocyanin mixed standard**Table S4;** Gradient concentration information of mixed standards of carotenoids**Table S5.**


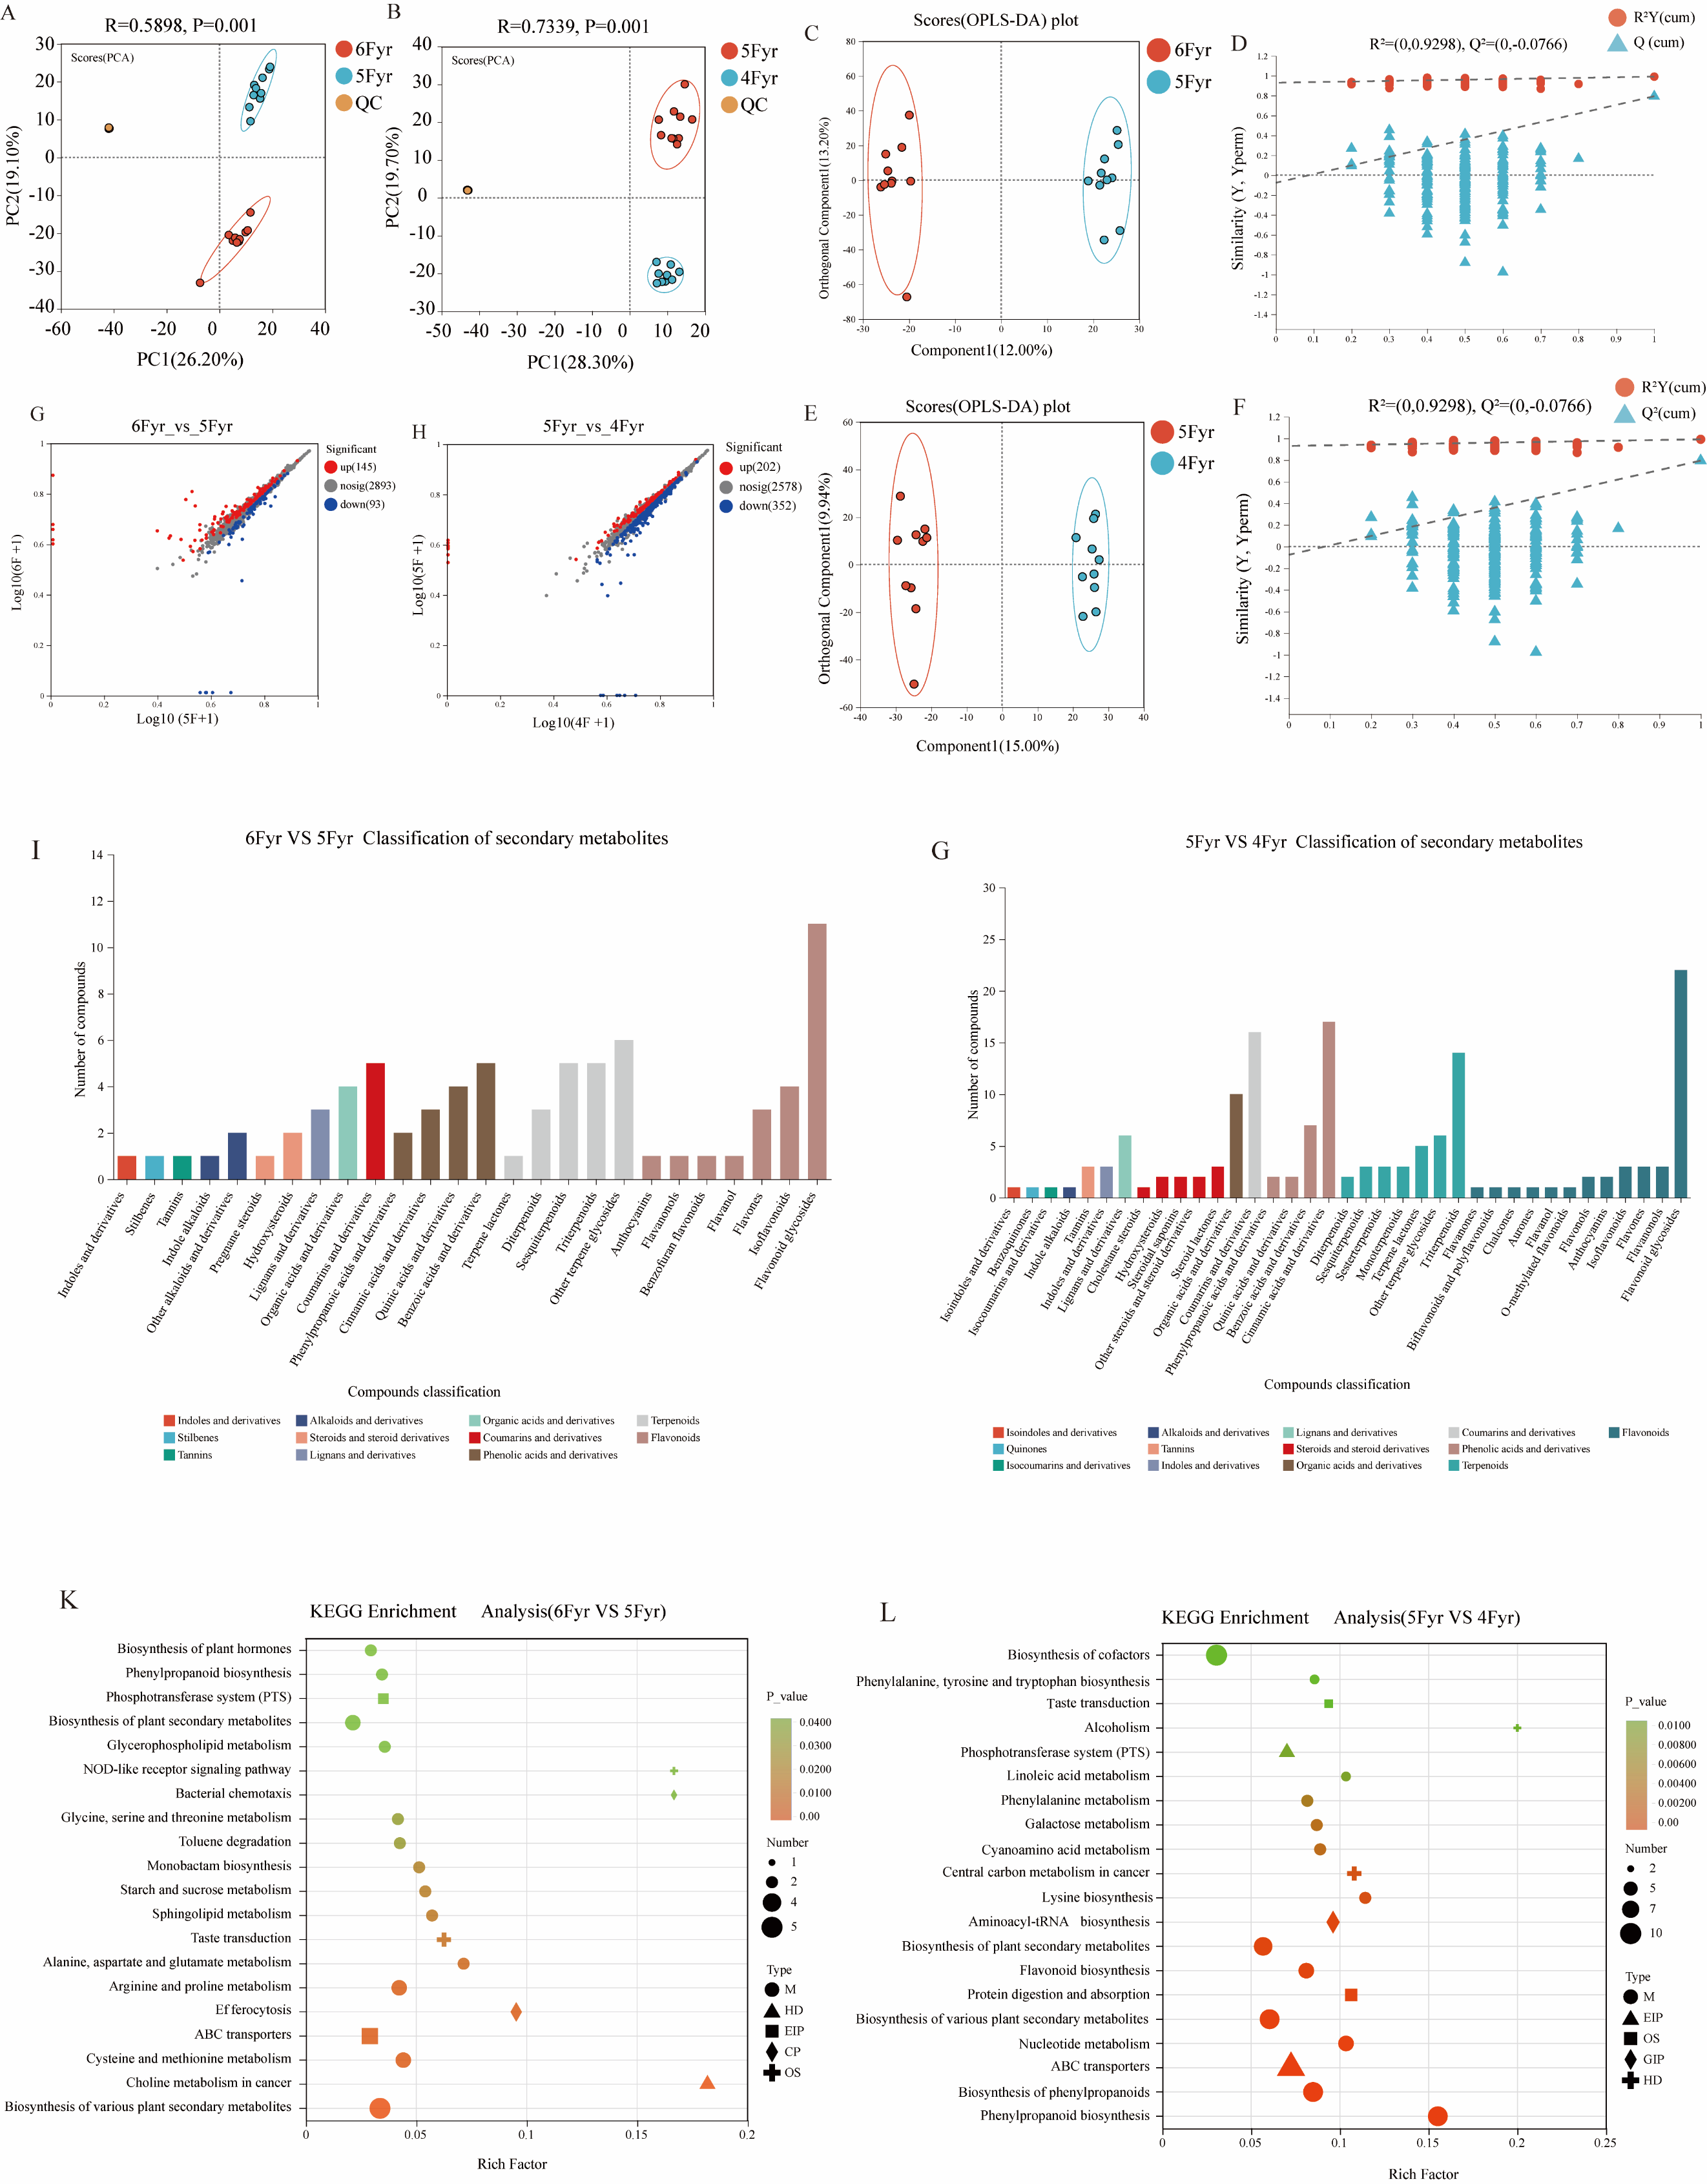


**Figure S1**. Metabolome analysis of sea buckthorn fruits from different years.


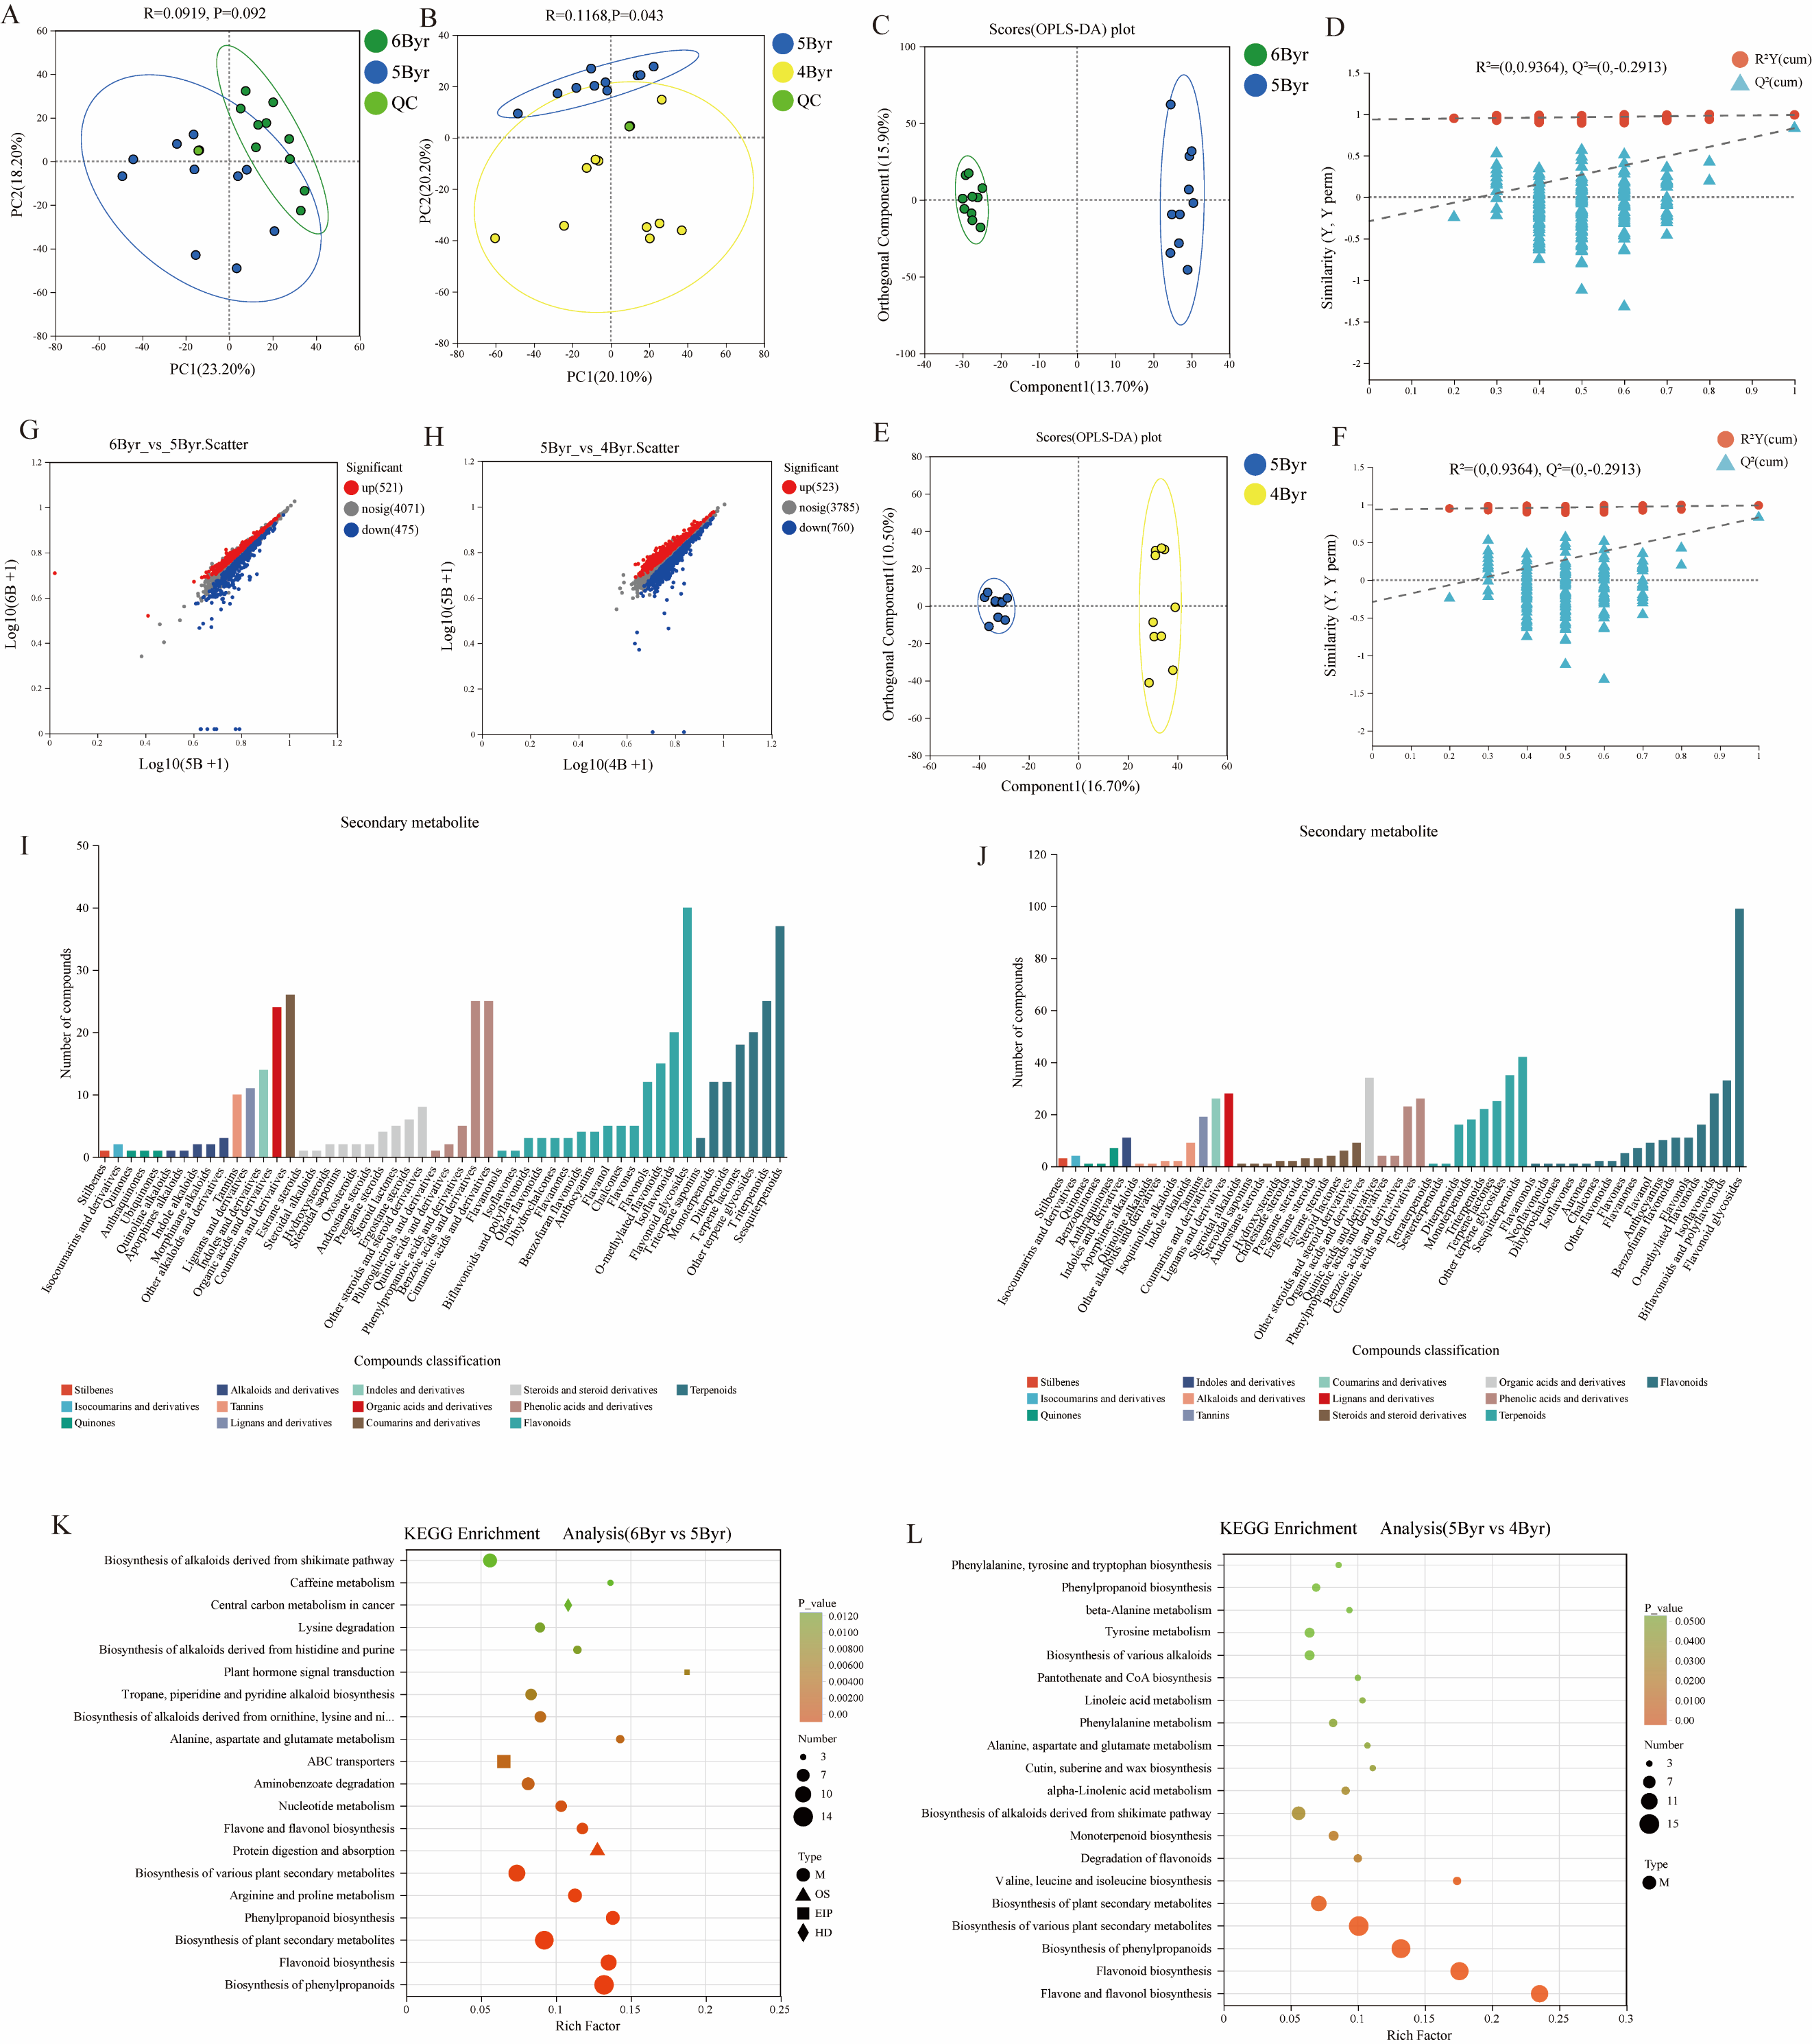


**Figure S2**. Metabolome analysis of sea buckthorn branch from different years.


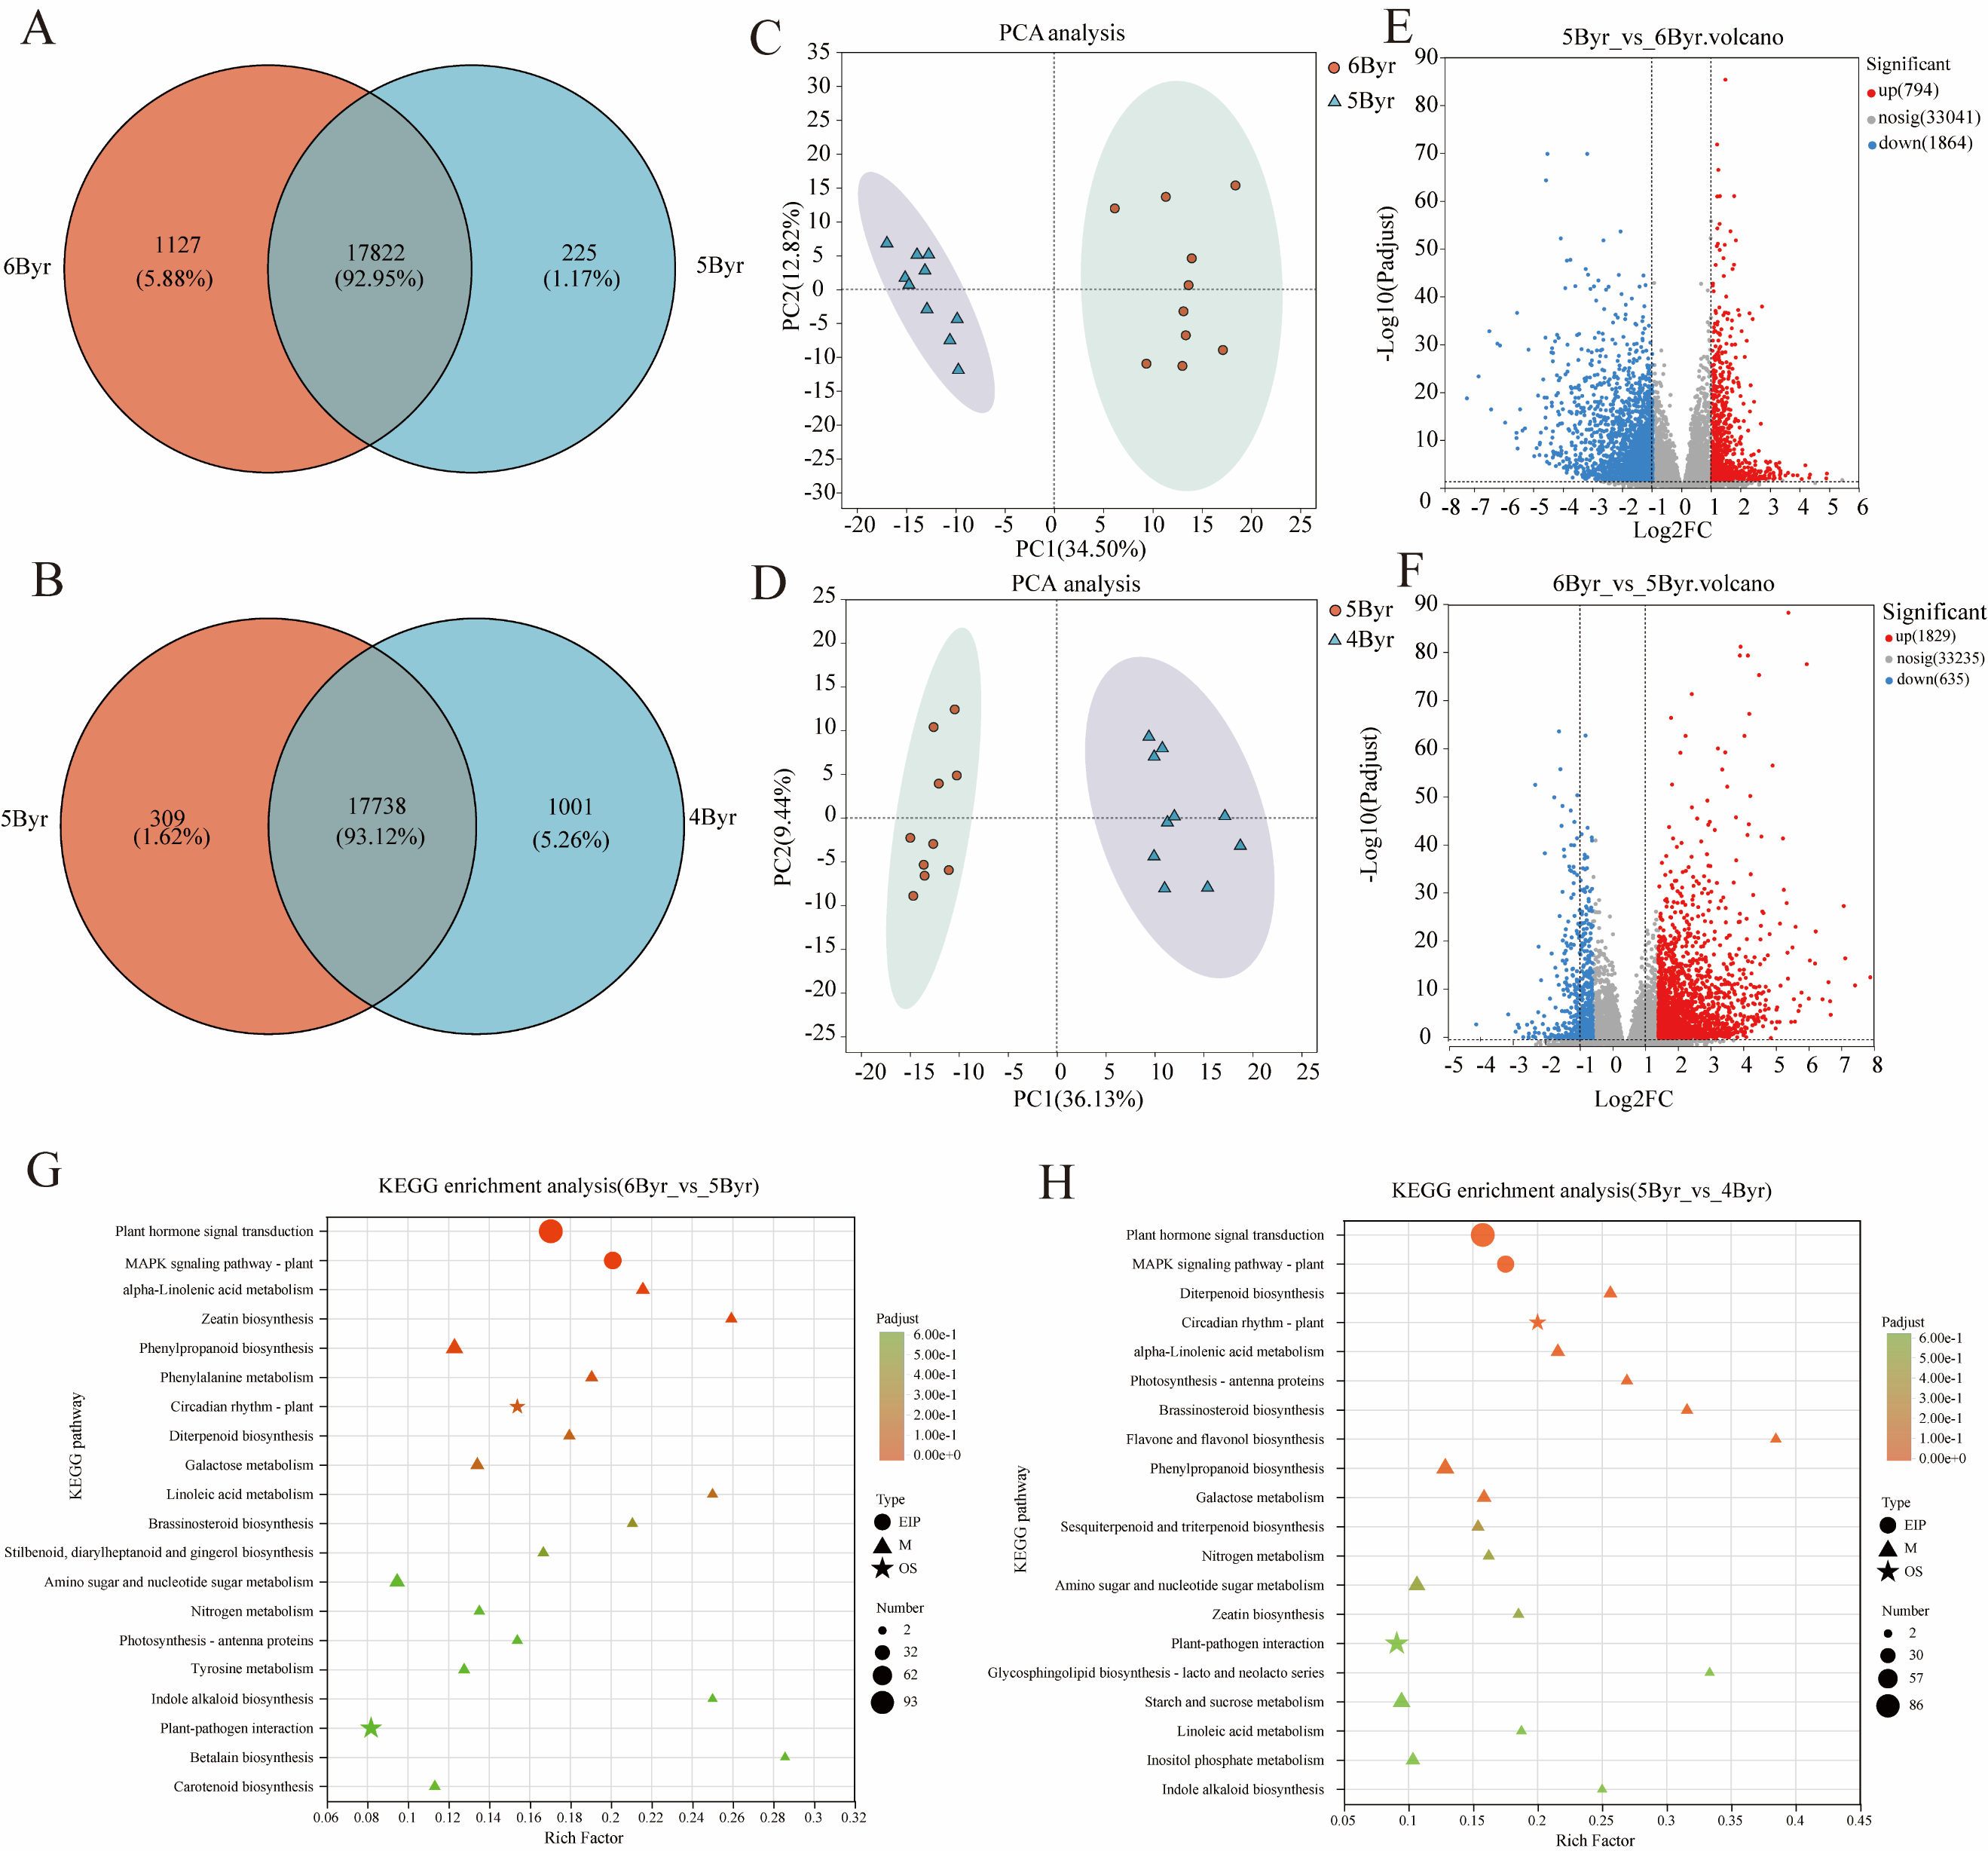


**Figure S3**. Transcriptome analysis of sea buckthorn branches in different year.


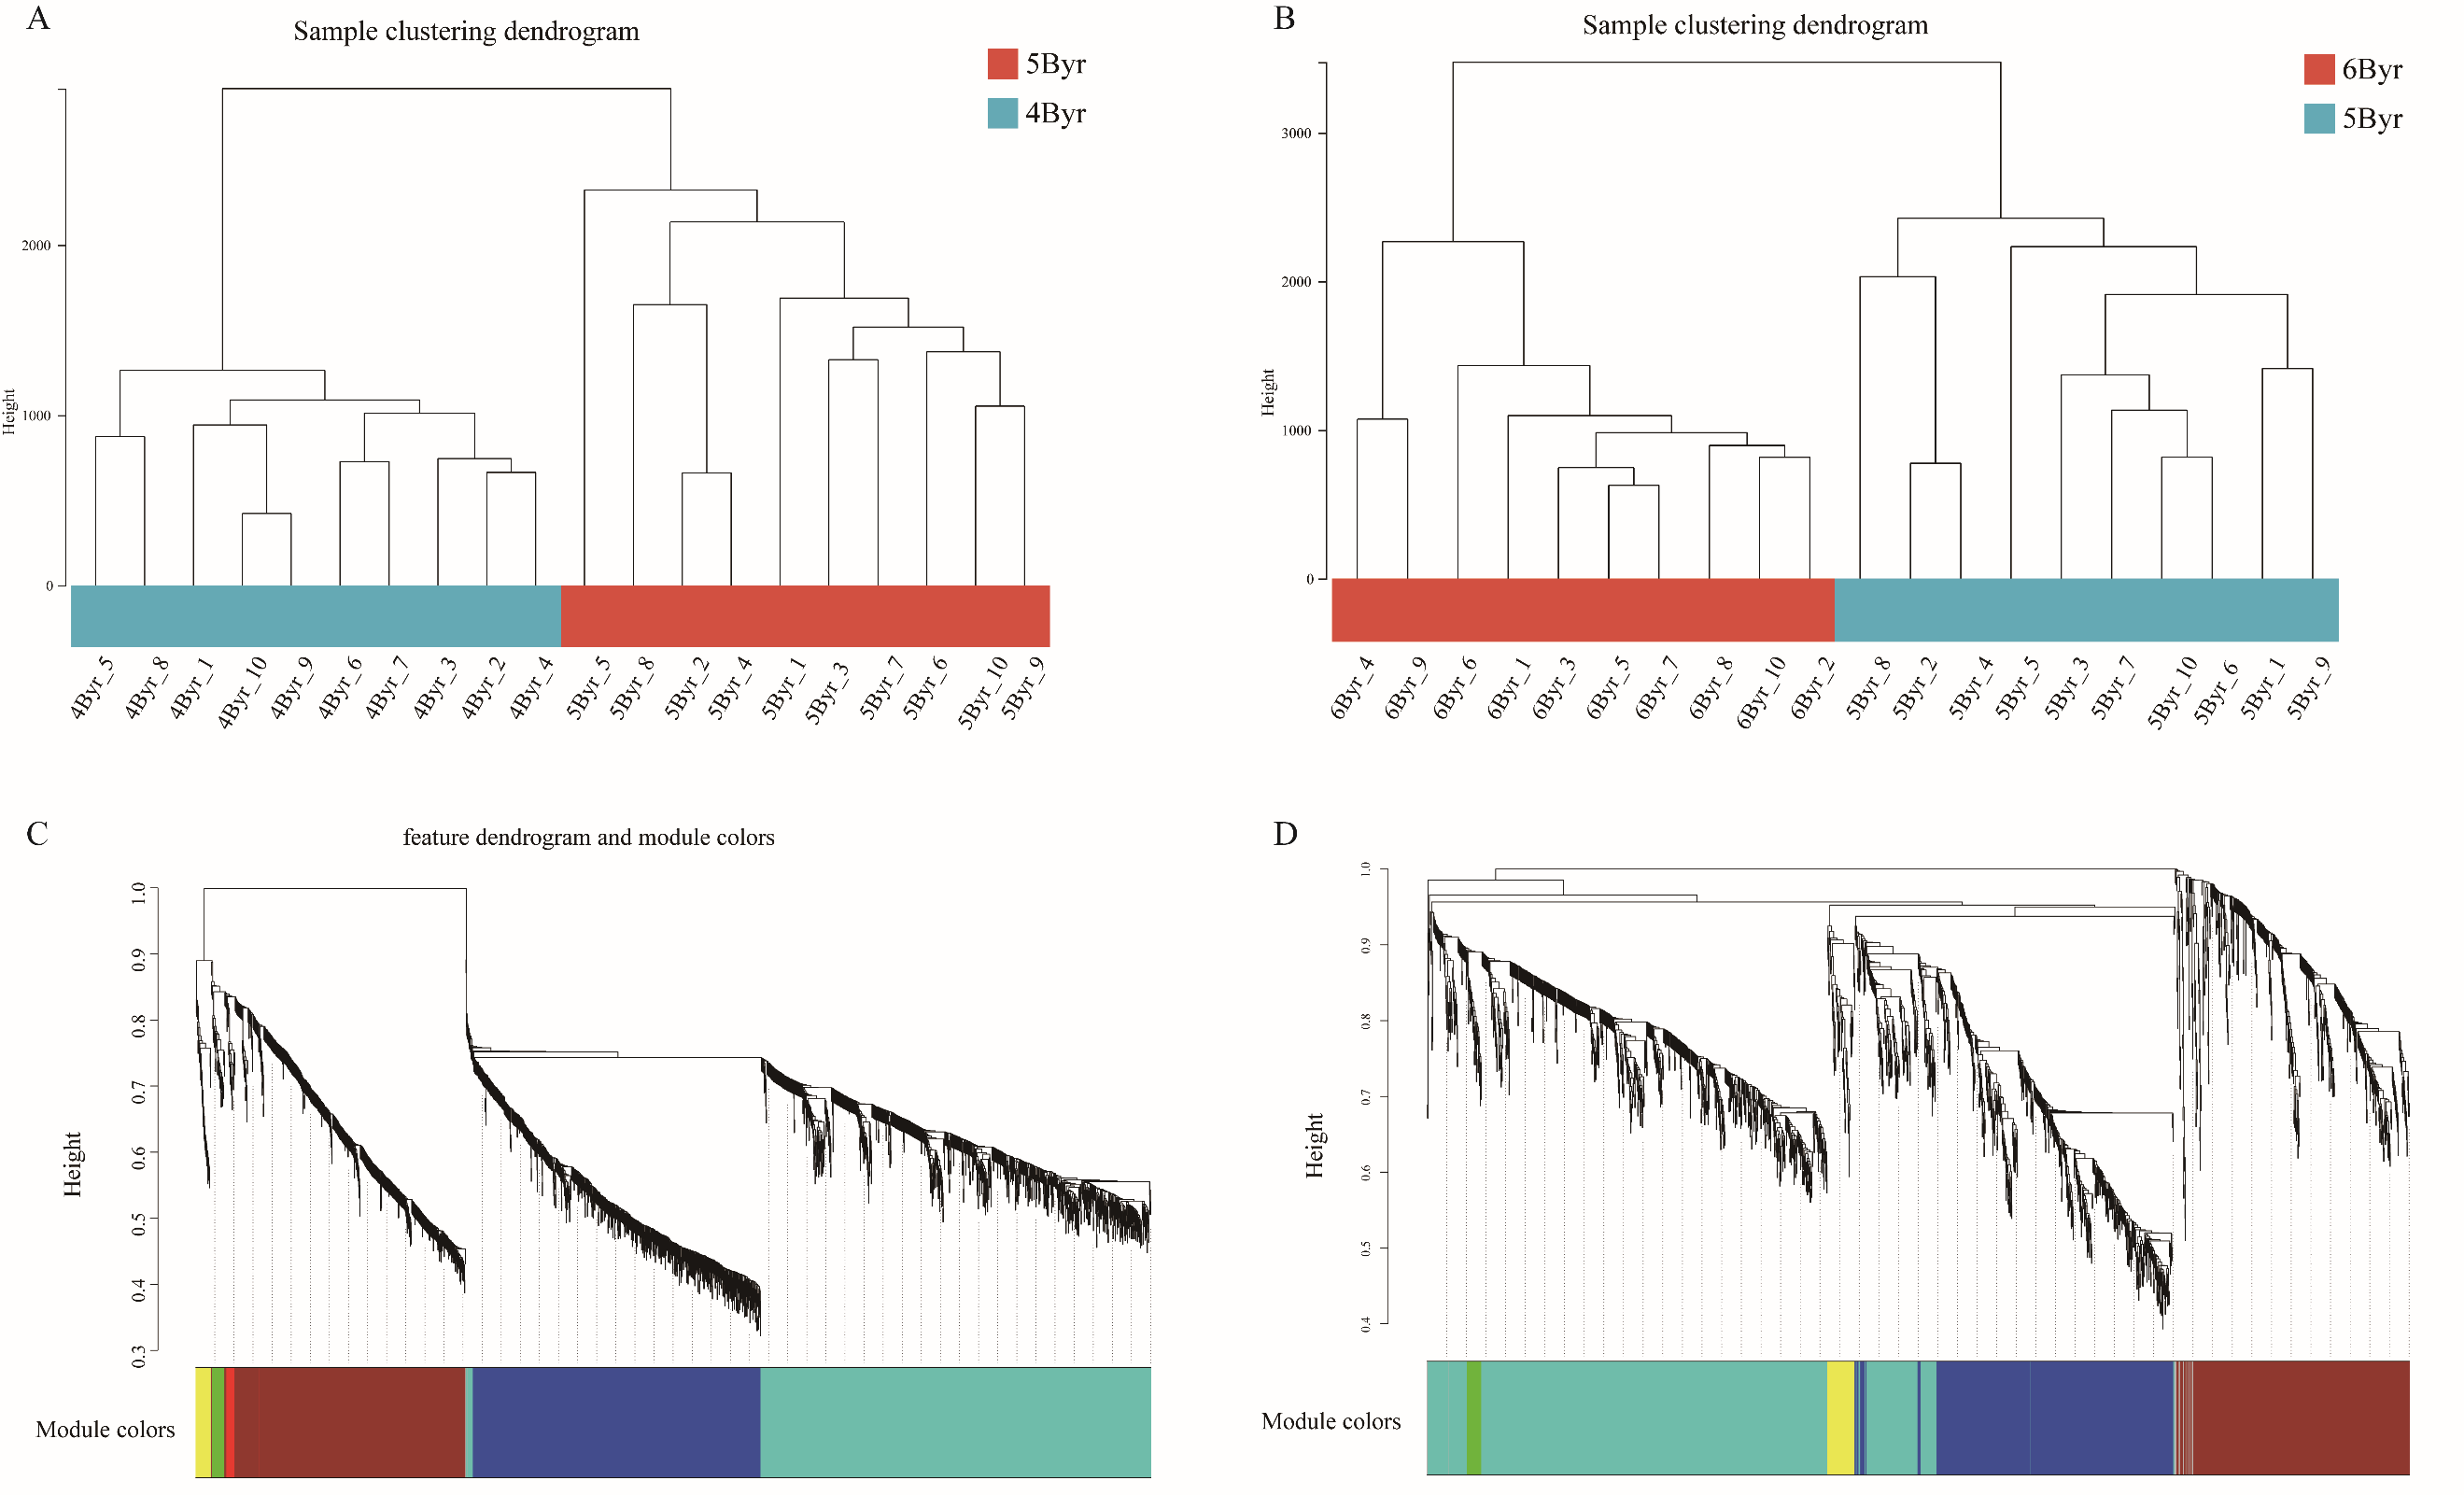


**Figure S4**. WGCNA analysis of sea buckthorn branches in different years.


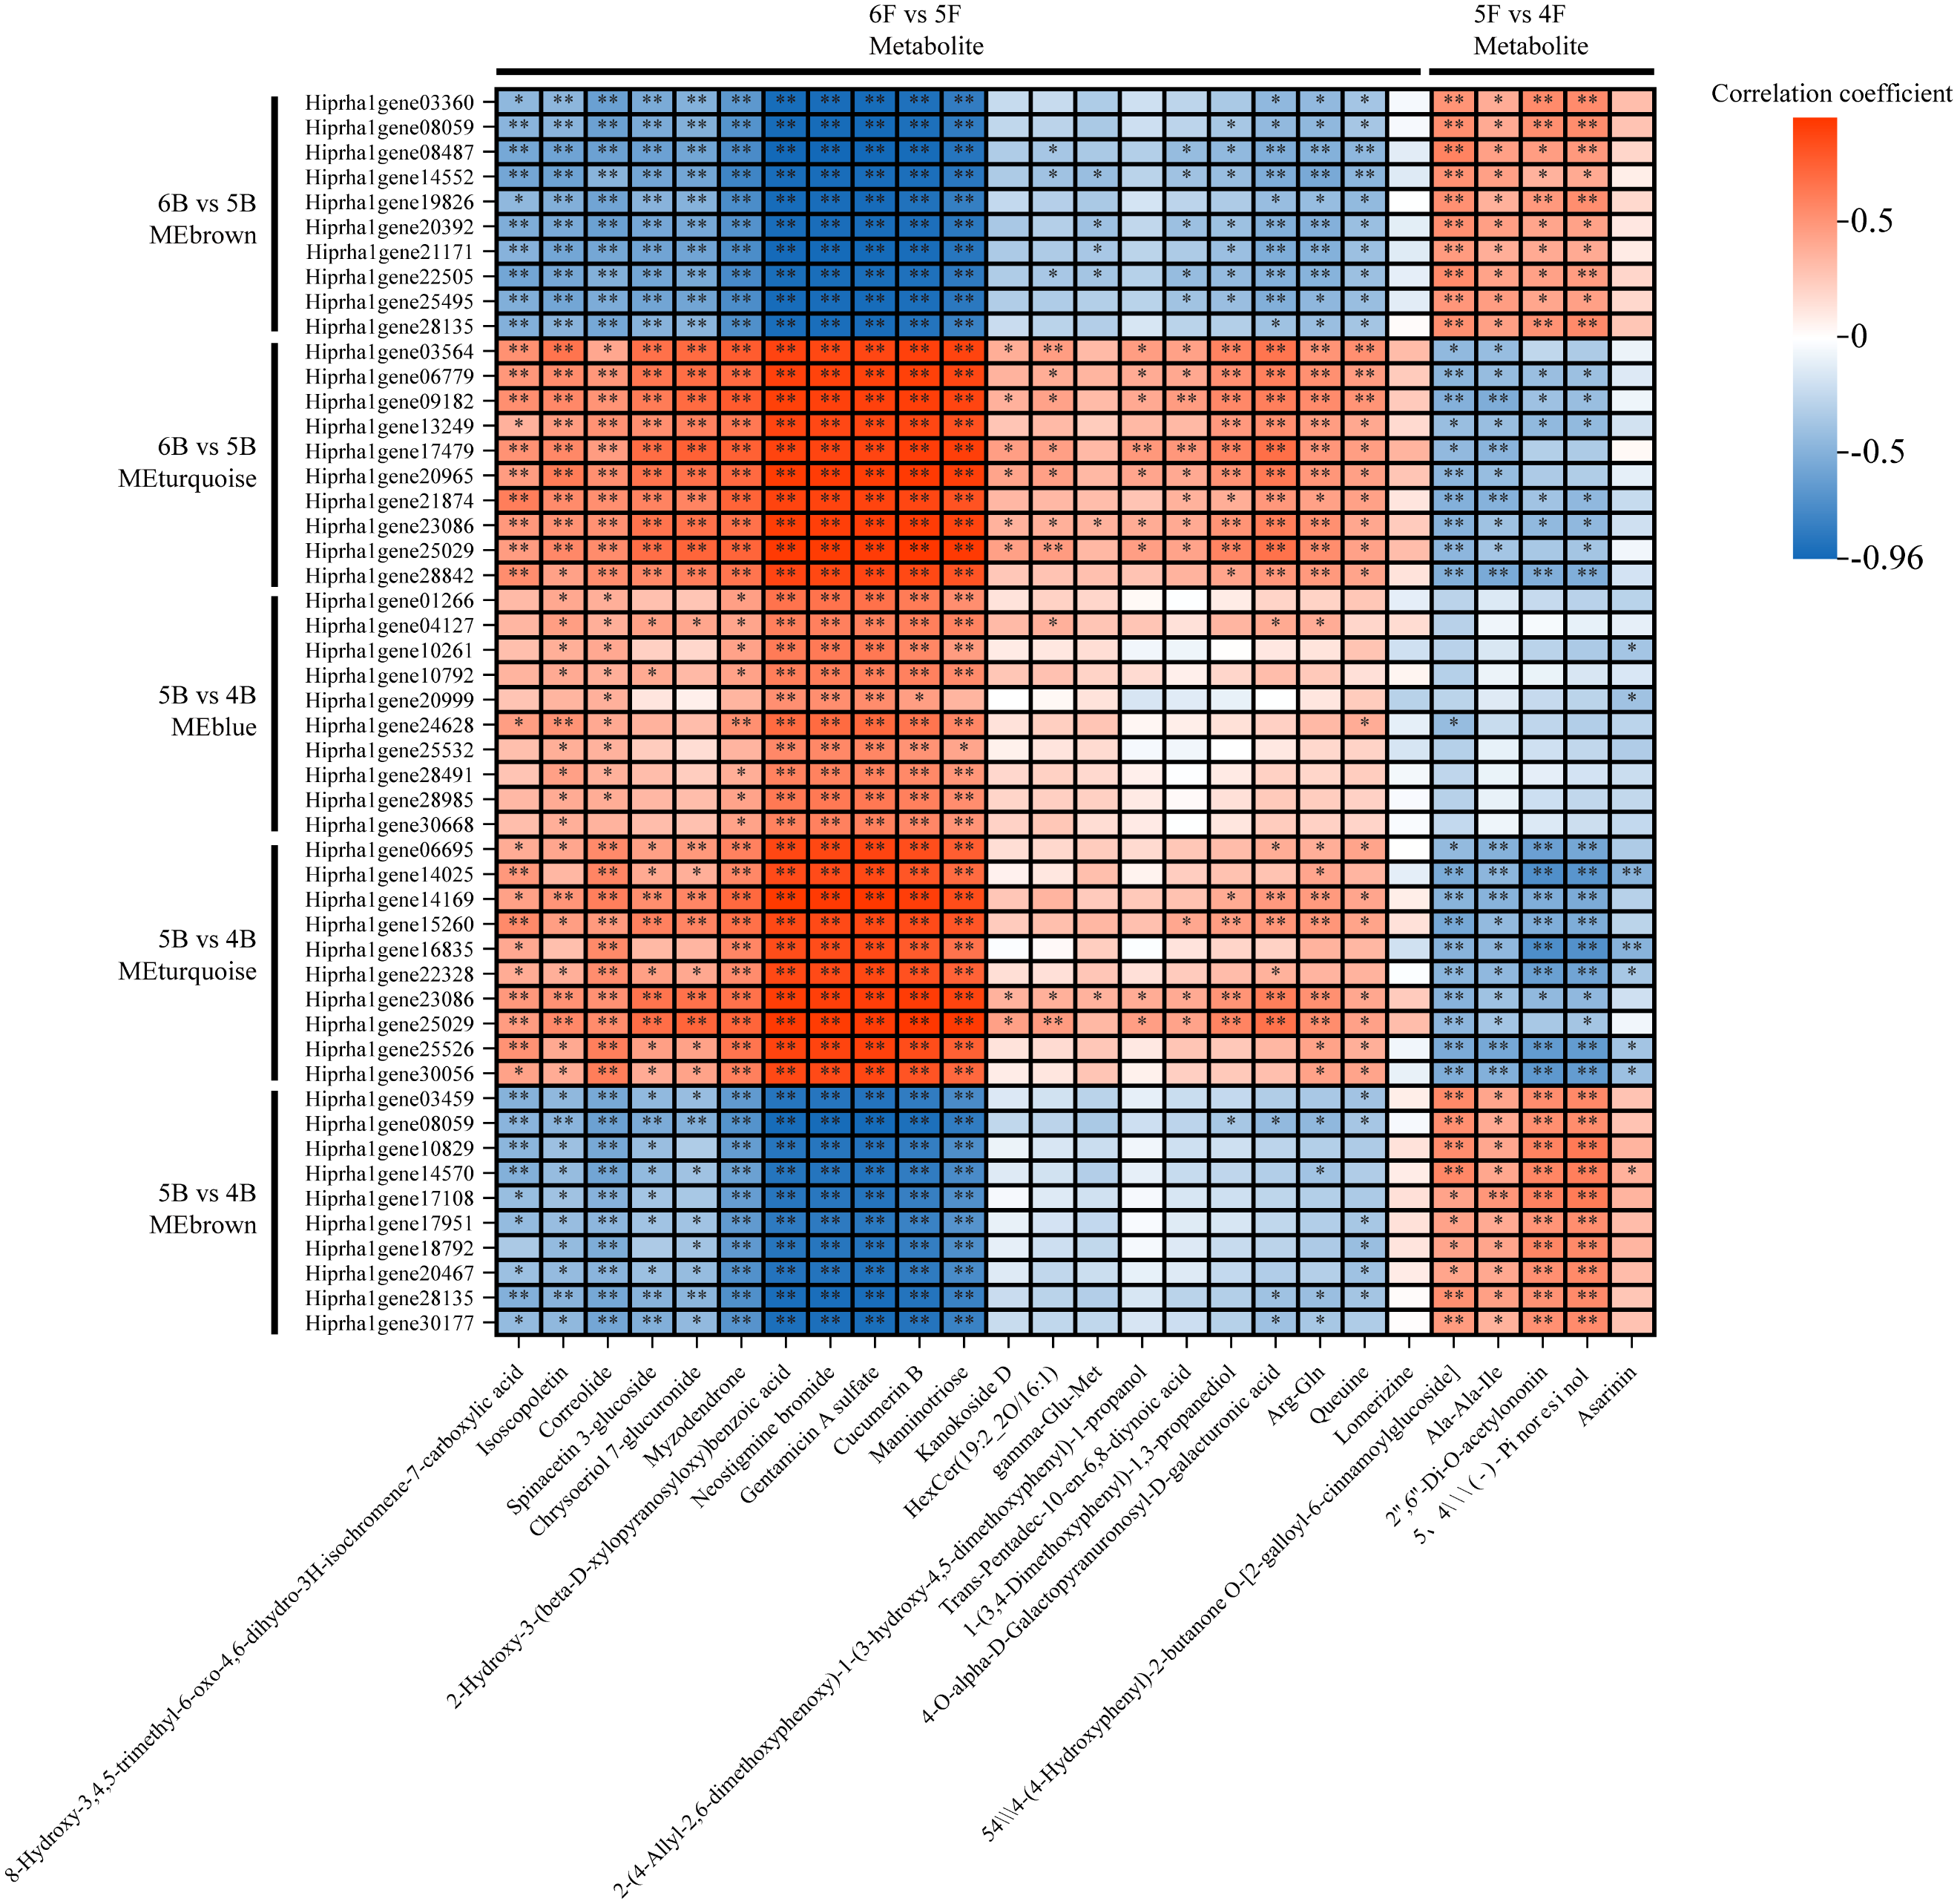


**Figure S5.** Correlation analysis between the top 10 genes in each module of branches and metabolites of fruit growth.

**Table S1**. Comparison of physical properties and color indices of *Hippophae rhamnoides* fruits at different tree ages (n=5).

| Item | 4F | 5F | 6F | SEM | *P* |
| --- | --- | --- | --- | --- | --- |
| Length (mm) | 10.74b | 13.32a | 13.54a | 0.386 | ＜0.001 |
| Width (mm) | 7.74c | 8.23b | 8.48a | 0.113 | ＜0.001 |
| Weight(g) | 0.38b | 0.51a | 0.54a | 0.017 | ＜0.001 |

SEM, the standard error of the mean; Different lowercase letters (a, b, c) in the same row indicate significant differences at the 0.05 level.

**Table S2**. KEGG pathway enrichment analysis of differentially metabolites in *Hippophae rhamnoides* fruits at different tree ages.

| Pathway | Description | Class | Total | Differential  metabolites | Compounds (dem) |
| --- | --- | --- | --- | --- | --- |
| ath01110 | Biosynthesis of secondary metabolites - Arabidopsis thaliana (thale cress) | Global and overview maps | 2335 | 7 | C05904; C01514; C00389; C05908; C05905; C05625; C05903 |
| ath01100 | Metabolic pathways - Arabidopsis thaliana (thale cress) | Global and overview maps | 3190 | 6 | C05904; C01514; C00389; C05905; C05625; C05903 |
| ath00941 | Flavonoid biosynthesis - Arabidopsis thaliana (thale cress) | Biosynthesis of other secondary metabolites | 74 | 6 | C05904; C01514; C00389; C05908; C05905; C05903 |
| ath00944 | Flavone and flavonol biosynthesis - Arabidopsis thaliana (thale cress) | Biosynthesis of other secondary metabolites | 51 | 4 | C01514; C00389; C05625; C05903 |
| ath00942 | Anthocyanin biosynthesis - Arabidopsis thaliana (thale cress) | Biosynthesis of other secondary metabolites | 66 | 3 | C05904; C05908; C05905 |

**Table S3**. Standard product information.

| Classification | Name | CAS number | Molecular formula |
| --- | --- | --- | --- |
| Anthocyanin | Malvidin | 643-84-5 | C17H15ClO7 |
| Pelargonidin | 134-04-3 | C15H11ClO5 |
| Delphinidin | 528-53-0 | C15H11ClO7 |
| Peonidin | 134-01-0 | C16H13ClO6 |
| Cyanidin-3-galactoside | 27661-36-5 | C21H21ClO11 |
| Isorhamnetin | 480-19-3 | C16H12O7 |
| Cyanidin | 528-58-5 | C15H11ClO6 |
| Cyanidin-3,5-diglucoside | 2611-67-8 | C27H31ClO16 |
| Petunidin | 1429-30-7 | C16H13ClO7 |
| Quercetin | 117-39-5 | C15H10O7 |
| Rutin | 153-18-4 | C27H30O16 |
| Procyanidin B4 | 29106-51-2 | C30H26O12 |
| Luteolin | 491-70-3 | C15H10O6 |
| Procyanidin B2 | 29106-49-8 | C30H26O12 |
| Kaempferol | 520-18-3 | C15H10O6 |
| Carotenoid | Zeaxanthin | 144-68-3 | C40H56O2 |
| β-Cryptoxanthin | 472-70-8 | C40H56O |
| Xanthophyll (Lutein) | 127-40-2 | C40H56O2 |
| β-Carotene | 7235-40-7 | C40H56 |
| α-Carotene | 7488-99-5 | C40H56 |
| Lycopene | 502-65-8 | C40H56 |
| Capsanthin | 465-42-9 | C40H56O3 |
| Violaxanthin | 126-29-4 | C40H56O4 |
| Neoxanthin | 14660-91-4 | C40H58O4 |

The standard samples mainly come from Sigma company.

**Table S4**. Gradient concentration information of anthocyanin mixed standard。

| Compound | Concentration (ng/mL) | | | | | | | |
| --- | --- | --- | --- | --- | --- | --- | --- | --- |
| Malvidin | 50 | 100 | 200 | 300 | 500 | 800 | 1000 | 2000 |
| Pelargonidin | 50 | 100 | 200 | 300 | 500 | 800 | 1000 | 2000 |
| Delphinidin | 50 | 100 | 200 | 300 | 500 | 800 | 1000 | 2000 |
| Peonidin | 50 | 100 | 200 | 300 | 500 | 800 | 1000 | 2000 |
| Cyanidin-3-galactoside | 50 | 100 | 200 | 300 | 500 | 800 | 1000 | 2000 |
| Isorhamnetin | 50 | 100 | 200 | 300 | 500 | 800 | 1000 | 2000 |
| Cyanidin | 50 | 100 | 200 | 300 | 500 | 800 | 1000 | 2000 |
| Cyanidin-3,5-diglucoside | 50 | 100 | 200 | 300 | 500 | 800 | 1000 | 2000 |
| Petunidin | 50 | 100 | 200 | 300 | 500 | 800 | 1000 | 2000 |
| Quercetin | 50 | 100 | 200 | 300 | 500 | 800 | 1000 | 2000 |
| Rutin | 50 | 100 | 200 | 300 | 500 | 800 | 1000 | 2000 |
| Procyanidin B4 | 50 | 100 | 200 | 300 | 500 | 800 | 1000 | 2000 |
| Luteolin | 50 | 100 | 200 | 300 | 500 | 800 | 1000 | 2000 |
| Procyanidin B2 | 50 | 100 | 200 | 300 | 500 | 800 | 1000 | 2000 |
| Kaempferol | 50 | 100 | 200 | 300 | 500 | 800 | 1000 | 2000 |

**Table S5**. Gradient concentration information of mixed standards of carotenoids.

| Compound | Concentration (μg/mL) | | | | | | |
| --- | --- | --- | --- | --- | --- | --- | --- |
| Neoxanthin | 0.1 | 0.5 | 1 | 2 | 4 | 6 | 7 |
| Violaxanthin | 0.1 | 0.5 | 1 | 2 | 4 | 6 | 7 |
| Capsanthin | 0.2 | 1 | 2 | 4 | 8 | 12 | 14 |
| Xanthophyll (Lutein) | 0.1 | 0.5 | 1 | 2 | 4 | 6 | 7 |
| Zeaxanthin | 0.2 | 1 | 2 | 4 | 8 | 12 | 14 |
| β-Cryptoxanthin | 0.25 | 1.25 | 2.5 | 5 | 10 | 15 | 17.5 |
| α-Carotene | 0.1 | 0.5 | 1 | 2 | 4 | 6 | 7 |
| β-Carotene | 0.1 | 0.5 | 1 | 2 | 4 | 6 | 7 |
| Lycopene | 0.1 | 0.5 | 1 | 2 | 4 | 6 | 7 |
